# Supplementary material for: Architecture and RNA binding of the human negative elongation factor
Source: eLife. 2016 Jun 10;5:e14981. doi: 10.7554/eLife.14981 (PMC4940160; doi:10.7554/eLife.14981)
Supplement: Figure 3—source data 1. — DOI: http://dx.doi.org/10.7554/eLife.14981.010 [file elife-14981-fig3-data1.xlsx]

## Sheet: NELF Inter
Protein1	Protein2	AbsPos1	AbsPos2	Mz	z	Error_rel[ppm]	ld-Score
NELFA	NELFC	429	494	429.262	4	0.7	41.06
NELFA	NELFB	200	497	551.307	4	1.7	40.17
NELFA	NELFC	200	353	571.56	4	1.5	40.17
NELFC	NELFB	380	92	543.312	4	1.2	39.85
NELFA	NELFB	200	126	622.022	3	2.4	39.34
NELFE	NELFB	70	438	545.835	4	1.2	39.19
NELFB	NELFA	92	429	489.791	4	1.1	39.15
NELFA	NELFB	200	497	341.857	6	0.4	39.04
NELFB	NELFC	85	380	843.787	3	2.2	38.93
NELFC	NELFB	343	85	880.971	4	2.4	38.9
NELFA	NELFC	190	380	580.312	4	1.2	38.42
NELFC	NELFB	353	278	636.676	3	1.5	38.31
NELFB	NELFE	438	95	439.271	4	2.9	38.13
NELFA	NELFC	200	494	542.065	4	2	38.11
NELFB	NELFE	438	97	424.501	4	0	37.91
NELFB	NELFA	85	219	833.12	3	0.6	37.84
NELFB	NELFA	85	200	692.373	4	1.7	37.65
NELFA	NELFB	200	146	549.799	4	1.3	37.46
NELFC	NELFA	384	200	574.52	5	-0.1	37.4
NELFA	NELFB	55	72	571.859	4	0	37.28
NELFA	NELFC	200	518	420.234	5	0.3	37.24
NELFB	NELFE	146	95	465.268	4	1.2	37.18
NELFA	NELFB	200	92	602.593	4	1.2	37.14
NELFB	NELFE	438	87	558.654	3	1.5	37.11
NELFA	NELFB	200	278	504.527	4	0.8	36.98
NELFE	NELFB	78	278	688.717	3	1	36.92
NELFA	NELFB	200	126	505.793	4	0.7	36.87
NELFB	NELFE	85	332	881.794	3	0.6	36.79
NELFA	NELFC	200	494	402.633	5	0.8	36.67
NELFB	NELFA	85	200	522.879	5	0.5	36.65
NELFB	NELFE	135	87	521.532	4	2	36.59
NELFB	NELFC	85	518	721.045	3	1.2	36.58
NELFB	NELFC	278	518	392.215	4	-0.4	36.48
NELFB	NELFE	92	97	464.268	4	0.8	36.33
NELFB	NELFE	85	87	731.383	3	0.3	36.1
NELFA	NELFB	429	278	573.997	3	-1.1	36.07
NELFE	NELFB	130	85	747.877	4	1	35.96
NELFB	NELFE	85	97	738.394	3	0.4	35.8
NELFE	NELFB	130	519	942.505	3	1.8	35.77
NELFA	NELFB	190	92	762.757	3	-0.6	35.7
NELFA	NELFB	200	92	751.088	3	0.8	35.69
NELFA	NELFC	207	353	731.058	3	2.4	35.69
NELFA	NELFC	55	125	548.141	5	2.2	35.64
NELFA	NELFC	190	494	511.791	4	-0.8	35.62
NELFA	NELFE	200	87	493.768	4	-0.9	35.57
NELFA	NELFB	200	278	435.044	5	1.4	35.51
NELFE	NELFC	95	494	557.675	3	2.5	35.47
NELFA	NELFB	219	438	495.545	4	0.8	35.38
NELFB	NELFA	85	190	882.464	3	0.6	35.36
NELFB	NELFC	278	494	409.238	4	1.3	35.06
NELFA	NELFB	429	497	438.504	4	0.5	35.05
NELFA	NELFB	200	72	408.232	5	0.9	35.02
NELFB	NELFA	146	429	476.022	4	1.1	34.84
NELFA	NELFC	200	380	462.659	5	0.8	34.75
NELFE	NELFA	130	429	825.103	3	0.1	34.7
NELFA	NELFB	200	210	510.537	4	1.6	34.63
NELFC	NELFB	384	497	592.827	4	0.7	34.47
NELFA	NELFB	200	438	419.242	5	0.2	34.42
NELFE	NELFB	130	497	808.745	3	1.3	34.34
NELFB	NELFC	85	494	558.058	4	0.2	34.34
NELFC	NELFA	388	200	839.417	4	3.4	34.33
NELFA	NELFC	170	494	595.033	3	1.2	34.28
NELFA	NELFC	219	494	474.784	4	2.3	34.23
NELFA	NELFB	207	146	526.785	4	1.1	34.21
NELFC	NELFA	384	200	904.83	3	1.7	34.15
NELFB	NELFE	146	87	593.318	3	0.3	34.12
NELFE	NELFB	130	135	720.618	4	-0.2	34.06
NELFB	NELFE	497	87	543.294	3	0.4	34.01
NELFB	decoy_reverse_NELFA	146	257	576.991	3	1.1	33.93
NELFA	NELFC	215	494	578.838	4	1	33.89
NELFB	NELFA	85	429	772.426	3	2.2	33.84
NELFE	NELFB	95	278	559.659	3	1.2	33.73
NELFA	NELFE	190	87	669.694	3	2.3	33.7
NELFC	NELFA	388	200	702.955	5	2.6	33.67
NELFA	NELFB	219	92	535.312	4	1.4	33.56
NELFA	NELFC	200	384	543.543	4	0.3	33.47
NELFA	NELFB	190	126	633.691	3	1.8	33.45
NELFA	NELFB	181	278	644.854	4	0.1	33.43
NELFB	NELFE	85	21	711.724	3	0	33.4
NELFA	NELFB	190	278	684.037	3	1.4	33.4
NELFC	NELFA	67	429	674.618	4	-0.2	33.37
NELFA	NELFC	200	384	582.568	4	1	33.37
NELFA	NELFC	170	494	485.551	4	0	33.32
NELFB	decoy_reverse_NELFE	85	363	566.069	4	0.7	33.24
NELFA	NELFE	371	130	1041.27	4	-2.4	33.18
NELFE	NELFB	82	497	412.225	5	1.5	33.07
NELFA	NELFC	207	380	739.742	3	2.2	33.07
NELFB	NELFE	85	78	887.146	3	2.2	33.04
NELFC	NELFB	353	126	439.999	4	0.3	33.02
NELFE	NELFB	97	146	582.573	4	1	32.94
NELFE	NELFB	95	278	430.041	5	0.1	32.87
NELFE	NELFB	130	146	644.328	4	1	32.86
NELFB	NELFE	92	87	611.676	3	0.1	32.84
NELFC	NELFA	343	219	797.694	4	1.1	32.81
NELFE	NELFC	260	494	739.15	4	1.9	32.81
NELFA	NELFC	255	518	863.134	3	1.4	32.8
NELFE	NELFB	95	497	545.054	4	0.1	32.75
NELFB	NELFE	497	97	330.587	5	0.5	32.74
NELFC	NELFA	343	207	802.937	4	2.2	32.68
NELFC	NELFB	384	92	644.113	4	0.5	32.66
NELFE	NELFB	95	497	427.749	4	-1.1	32.65
NELFA	NELFC	207	518	463.001	4	-0.4	32.6
NELFA	NELFB	207	497	489.267	4	0	32.59
NELFA	NELFC	255	494	664.625	4	0.9	32.59
NELFB	NELFE	278	87	399.968	4	0.1	32.57
NELFC	NELFA	125	190	505.685	5	1.1	32.56
NELFB	NELFE	166	130	1194.12	4	3.4	32.55
NELFB	NELFC	85	384	733.893	4	0.6	32.51
NELFC	NELFA	67	55	648.375	5	0.6	32.49
NELFA	NELFC	456	494	682.896	4	1.8	32.36
NELFA	NELFE	200	95	513.797	4	1.3	32.34
NELFE	NELFB	82	92	702.717	3	0.9	32.29
NELFA	NELFB	55	278	453.281	5	1.7	32.26
NELFA	NELFB	371	85	801.613	5	-0.4	32.26
NELFC	NELFB	343	92	791.191	4	2.7	32.24
NELFE	NELFC	130	518	773.724	3	1.1	32.2
NELFE	NELFB	95	146	776.428	3	2.1	32.19
NELFA	NELFC	207	494	480.025	4	1.4	32.18
NELFA	NELFE	272	21	482.625	3	0	32.15
NELFA	NELFB	200	146	588.825	4	1.6	32.14
NELFE	NELFB	130	92	877.126	3	-0.1	32.12
NELFA	NELFB	429	126	523.652	3	1.5	32.07
NELFE	NELFB	101	278	718.887	4	-4	32.07
NELFE	NELFB	97	438	445.461	5	1	32.03
NELFB	NELFE	278	21	417.248	4	-0.8	32.03
NELFE	NELFC	78	518	664.035	3	0.1	31.98
NELFA	NELFC	200	353	610.584	4	-0.7	31.95
NELFC	NELFE	494	97	537.983	3	0.8	31.86
NELFC	NELFA	125	429	549.325	4	2.1	31.82
NELFE	NELFA	130	200	923.471	3	-0.8	31.76
NELFA	NELFB	55	497	459.485	5	2.9	31.76
NELFB	NELFC	85	125	678.12	4	-0.4	31.76
NELFE	NELFB	332	278	512.778	4	2.6	31.71
NELFC	NELFE	125	95	538.57	4	0.7	31.69
NELFC	NELFB	522	92	675.873	4	-2.3	31.66
NELFA	NELFC	200	125	415.736	6	0.5	31.55
NELFA	NELFB	255	72	671.622	4	-1.5	31.51
NELFB	decoy_reverse_NELFE	135	284	526.79	4	-0.2	31.51
NELFA	NELFB	200	72	549.062	4	0.3	31.5
NELFA	NELFC	255	125	784.687	4	0.1	31.49
NELFE	NELFB	95	438	556.573	4	-0.4	31.43
NELFC	NELFA	388	190	848.169	4	2.5	31.42
NELFE	NELFB	82	278	623.997	3	1.7	31.39
NELFE	NELFB	97	278	430.042	5	0.7	31.38
NELFA	NELFB	219	146	521.542	4	-2	31.37
NELFA	NELFB	207	92	540.553	4	0.3	31.35
NELFB	NELFE	497	21	314.585	5	0.6	31.34
NELFE	NELFB	101	497	581.517	5	-0.4	31.34
NELFE	NELFB	97	497	436.245	5	1.3	31.29
NELFA	NELFB	190	497	521.035	4	2.5	31.28
NELFC	NELFA	67	200	598.918	5	0.4	31.24
NELFE	NELFA	47	200	535.482	5	2.2	31.22
NELFA	NELFC	200	125	529.902	5	-0.4	31.13
NELFB	NELFE	146	97	450.499	4	0.4	31.11
NELFC	NELFA	125	219	594.845	4	0.9	31.08
NELFE	NELFB	130	278	798.407	3	2.5	31.08
NELFC	NELFB	388	126	707.854	4	0.6	31.07
NELFC	NELFB	353	92	536.799	4	1.4	30.98
NELFE	NELFB	332	146	743.731	3	1.6	30.98
NELFB	NELFE	135	97	526.79	4	0.7	30.94
NELFB	NELFE	85	82	617.069	4	-0.2	30.83
NELFA	NELFB	255	135	787.677	4	1.4	30.82
NELFA	NELFB	181	85	793.675	4	0.6	30.77
NELFA	NELFC	219	380	549.817	4	1.8	30.74
NELFA	NELFE	429	87	419.993	4	1.2	30.74
NELFC	NELFA	343	200	660.96	5	-0.3	30.71
NELFA	NELFC	200	518	389.014	5	0.3	30.62
NELFB	NELFE	497	21	340.203	5	-0.3	30.61
NELFB	NELFC	497	518	320.177	5	-0.1	30.58
NELFB	NELFC	85	353	626.58	4	2.5	30.57
NELFB	decoy_reverse_NELFA	519	257	660.726	3	1.1	30.54
NELFA	NELFC	200	380	493.88	5	1.6	30.41
NELFE	NELFB	34	85	717.118	4	1.6	30.41
NELFC	NELFB	388	85	894.435	4	1.3	30.32
NELFC	NELFE	67	130	1123.56	3	-1	30.27
NELFB	NELFA	85	520	638.583	4	-0.5	30.17
NELFA	NELFB	255	497	898.154	3	-0.1	30.17
NELFE	NELFB	82	497	634.336	3	2.2	30.06
NELFB	NELFE	166	130	1155.09	4	1.4	30.06
NELFE	NELFC	332	494	511.289	4	0.8	30.04
NELFA	NELFB	207	278	641.681	3	1.1	30.03
NELFC	NELFA	522	200	568.71	5	1.3	30
NELFA	NELFC	456	125	642.567	5	0	29.9
NELFC	NELFA	353	429	497.782	4	0.8	29.77
NELFA	NELFC	371	494	681.369	5	3.1	29.69
NELFE	NELFB	82	146	684.359	3	1	29.64
NELFA	NELFB	255	85	814.931	4	-2.8	29.62
NELFE	NELFA	97	272	382.224	4	1.3	29.59
NELFC	NELFB	125	278	529.301	4	1.4	29.56
NELFB	NELFE	210	87	405.978	4	0.6	29.5
NELFB	NELFA	135	207	603.077	4	3.7	29.44
NELFA	NELFB	200	135	501.074	5	1.6	29.37
NELFE	NELFB	47	278	607.323	4	1.7	29.37
NELFB	NELFC	85	380	733.893	4	-0.2	29.36
NELFA	NELFE	200	97	665.036	3	2.6	29.3
NELFC	NELFA	388	207	816.402	4	2.4	29.24
NELFB	NELFE	210	97	547.981	3	1.3	29.23
NELFA	decoy_reverse_NELFE	200	284	499.028	4	0.2	29.23
NELFA	NELFC	168	494	388.643	5	1	29.16
NELFE	NELFB	47	92	845.451	3	2.1	29.14
NELFA	NELFB	371	438	697.976	5	0	29.13
NELFB	NELFA	92	272	595.348	3	-0.4	29.09
NELFC	NELFB	380	497	492.026	4	2	29
NELFB	NELFE	85	23	566.07	4	2.7	28.97
NELFE	NELFC	47	518	742.048	3	2.3	28.78
NELFC	NELFA	67	190	1009.2	3	1.3	28.78
NELFC	NELFA	125	207	600.087	4	1.7	28.77
NELFE	NELFA	332	200	808.437	3	3.5	28.76
NELFE	NELFC	82	518	449.737	4	-1.5	28.73
NELFC	NELFB	272	85	1004.77	4	4	28.7
NELFE	NELFB	47	278	766.73	3	2.1	28.68
NELFA	NELFC	166	494	428.507	4	0.9	28.64
NELFC	NELFB	302	92	904.247	4	1	28.56
NELFE	NELFB	101	278	658.597	4	2.4	28.54
NELFB	NELFE	519	97	513.301	4	0.6	28.53
NELFE	NELFB	260	92	799.678	4	1.3	28.51
NELFE	decoy_reverse_NELFA	332	257	489.774	4	0.6	28.49
NELFC	NELFB	384	146	630.344	4	-0.4	28.49
NELFA	NELFE	371	34	808.616	5	2.3	28.49
NELFE	NELFC	130	125	717.629	4	-0.3	28.48
NELFE	NELFA	130	190	701.608	4	-0.7	28.46
NELFC	NELFB	522	85	765.656	4	1.7	28.42
NELFA	decoy_reverse_NELFC	166	207	557.323	4	2.9	28.33
NELFA	NELFB	456	278	547.708	5	0.7	28.22
NELFB	NELFA	434	200	558.297	6	0.8	28.21
NELFA	NELFC	371	353	736.184	5	0.8	28.16
NELFA	NELFC	371	125	971.519	4	0.9	28.04
NELFE	NELFC	332	125	631.351	4	0.8	28.01
NELFE	NELFB	332	210	518.788	4	2	27.97
NELFE	NELFC	95	494	535.813	4	1.8	27.96
NELFE	NELFB	47	126	716.383	3	0.8	27.89
NELFE	NELFB	355	497	701.364	4	3	27.81
NELFB	NELFE	193	130	1059.79	4	0.4	27.81
NELFA	NELFE	371	70	775.224	5	-0.3	27.8
NELFA	NELFC	371	67	1096.81	4	1.2	27.74
NELFC	NELFB	388	92	804.653	4	-1.1	27.71
NELFB	NELFE	85	97	686.12	4	-0.4	27.7
NELFB	NELFE	85	18	566.069	4	1	27.68
NELFB	NELFE	547	130	900.703	4	0.1	27.59
NELFB	NELFA	166	255	1222.15	4	0.1	27.57
NELFB	NELFA	85	166	771.417	3	-0.2	27.54
NELFE	NELFB	82	438	526.548	4	1.4	27.53
NELFB	NELFE	99	130	823.442	4	1.5	27.52
NELFA	NELFE	255	130	854.446	4	3.5	27.5
NELFE	NELFB	130	438	824.105	3	1.7	27.48
NELFE	NELFB	373	278	998.498	3	-0.3	27.44
NELFA	NELFC	219	353	543.303	4	0.2	27.44
NELFE	NELFB	21	497	425.002	4	-0.1	27.43
NELFC	NELFA	380	200	678.874	4	2.1	27.36
NELFC	NELFB	125	497	429.845	5	0.1	27.33
NELFE	NELFC	34	494	755.411	3	3	27.27
NELFA	NELFE	371	332	764.199	5	1.2	27.25
NELFC	NELFA	67	219	959.851	3	1.7	27.24
NELFE	NELFA	130	200	731.883	4	2.6	27.17
NELFA	NELFC	272	518	491.946	3	1.6	27.12
NELFE	NELFA	34	200	662.098	4	1.5	26.99
NELFB	NELFE	85	95	758.084	3	-2	26.95
NELFA	NELFC	215	494	728.75	3	1.3	26.93
NELFB	NELFA	193	200	772.406	5	0.2	26.9
NELFE	NELFB	47	85	724.119	4	1.4	26.87
NELFC	NELFE	67	332	756.644	4	-2.1	26.83
NELFE	NELFA	130	522	861.091	3	2.7	26.79
NELFE	NELFA	260	255	996.025	4	1.1	26.76
NELFE	NELFB	130	210	806.418	3	-0.5	26.75
NELFC	NELFE	125	87	415.036	5	2.4	26.64
NELFE	NELFC	260	125	687.571	5	1.3	26.56
NELFA	NELFC	371	522	847.444	5	0.4	26.49
NELFA	NELFC	215	353	647.358	4	0.5	26.36
NELFA	NELFE	200	332	645.604	4	1.5	26.36
NELFC	NELFB	380	278	468.26	5	0.7	26.34
NELFC	NELFB	222	92	904.232	4	-1.8	26.33
NELFA	NELFB	456	547	986.03	4	0.3	26.32
NELFA	NELFB	215	85	729.145	4	-1.5	26.2
NELFA	NELFB	522	278	609.983	3	1.3	26.19
NELFE	NELFB	47	497	615.076	4	0.4	26.19
NELFC	NELFE	125	97	523.801	4	-0.4	26.11
NELFE	NELFB	332	497	520.532	4	1.6	26.1
NELFA	NELFE	181	130	833.184	4	0.7	26.1
NELFE	NELFB	47	438	792.428	3	1.3	26.03
NELFC	NELFE	67	87	643.838	4	2.2	25.97
NELFC	NELFA	402	200	807.904	6	2.3	25.95
NELFA	NELFB	371	135	779.808	5	0.7	25.86
NELFE	NELFB	101	146	611.532	5	2	25.84
NELFC	NELFA	272	200	633.501	6	2.1	25.83
NELFA	decoy_reverse_NELFE	276	286	477.08	5	1.3	25.58
NELFE	NELFC	260	518	722.124	4	-2.1	25.55
NELFB	NELFE	547	97	706.875	4	0.6	25.53
NELFA	NELFB	219	278	476.272	4	1.5	25.52
NELFE	NELFB	373	146	1058.86	3	-0.4	25.49
NELFA	NELFC	371	518	1112.24	3	0.9	25.47
NELFA	NELFB	207	85	729.149	4	4	25.45
NELFB	NELFE	434	130	931.473	4	3.8	25.45
NELFA	NELFB	207	126	591.336	3	2.1	25.43
NELFA	NELFE	200	95	631.1	4	0.1	25.43
NELFC	NELFA	384	207	524.889	5	0.8	25.39
NELFC	NELFB	388	497	753.369	4	2.2	25.33
NELFB	NELFE	72	130	784.003	5	1.2	25.11
NELFE	NELFB	47	497	583.053	4	1.9	25.08
NELFA	NELFC	255	67	1212.97	3	-0.3	25.05
NELFE	NELFA	130	520	903.789	3	3	24.87
NELFB	NELFA	72	200	590.483	6	-0.2	24.78
NELFA	NELFB	255	547	774.412	5	3.1	24.65
NELFA	NELFE	190	97	676.706	3	2	24.57
NELFC	NELFE	343	130	920.48	4	1.9	24.54
NELFA	NELFE	371	95	783.817	5	1.4	24.41
NELFA	NELFB	371	92	1215.64	3	-0.2	24.4
NELFA	decoy_reverse_NELFE	200	358	511.049	4	1.3	24.14
NELFA	NELFE	371	82	728.574	5	-2.1	24.03
NELFC	NELFB	272	92	732.191	5	1.6	24.01
NELFB	NELFA	291	200	625.095	4	-0.6	23.92
NELFA	NELFB	371	146	718.775	5	-0.1	23.88
NELFA	NELFC	371	384	1027.29	4	1	23.76
NELFA	NELFB	522	438	635.681	3	0.1	23.62
NELFA	NELFE	371	97	678.157	5	-1.1	23.59
NELFC	decoy_reverse_NELFA	67	329	748.395	4	0.2	23.58
NELFC	NELFE	353	97	472.26	4	0.8	23.54
NELFA	NELFB	371	413	1022.73	5	3.1	23.43
NELFB	NELFA	547	200	806.171	4	-3.5	23.36
NELFA	NELFB	371	291	973.514	4	0.7	23.18
NELFA	NELFB	371	213	860.058	5	2.1	22.95
NELFE	NELFB	95	92	794.785	3	0.4	22.94
NELFE	NELFC	260	67	984.506	4	0.4	22.9
NELFA	NELFC	371	343	939.696	5	0.5	22.88
decoy_reverse_NELFE	NELFA	311	200	582.334	5	-0.3	22.64
NELFE	NELFA	373	219	1085.89	3	-0.6	22.6
NELFE	NELFA	373	429	1025.2	3	3.6	22.41
NELFC	NELFA	522	219	682.38	4	1.9	22.25
NELFE	NELFB	260	146	785.909	4	0.7	22.11
NELFC	NELFA	272	219	921.488	4	-1.3	22.08
NELFC	NELFA	67	207	966.839	3	0.7	22.07

## Sheet: NELF_Intra
Protein1	Protein2	AbsPos1	AbsPos2	Mz	z	Error_rel[ppm]	ld-Score
NELFB	NELFB	135	146	769.745	3	-0.2	43.07
NELFB	NELFB	118	210	582.317	5	1.3	42.19
NELFB	NELFB	129	126	552.333	3	0.2	41.65
NELFB	NELFB	497	126	380.722	4	2	40.41
NELFA	NELFA	200	207	766.749	3	1.9	40.27
NELFA	NELFA	200	190	607.081	4	1.6	39.68
NELFB	NELFB	278	497	418.481	4	2.1	39.36
NELFA	NELFA	255	429	686.138	4	2.1	39.23
NELFB	NELFB	519	497	701.738	3	2.7	38.31
NELFA	NELFA	219	207	729.075	3	1.8	38.29
NELFB	NELFB	85	72	565.058	4	1.8	38.14
NELFB	NELFB	519	438	538.074	4	0	38
NELFA	NELFA	181	200	984.539	3	2	37.91
NELFB	NELFB	85	122	811.112	3	0.7	37.44
NELFA	NELFA	181	200	777.681	4	1.6	37.15
NELFB	NELFB	118	146	613.726	5	-0.6	37.06
NELFB	NELFB	85	146	604.82	4	2.8	36.8
NELFB	NELFB	85	210	565.557	4	1.5	36.69
NELFA	NELFA	456	429	563.728	5	1.8	36.6
NELFB	NELFB	213	146	677.873	4	2	36.54
NELFC	NELFC	380	494	482.783	4	0.6	36.21
NELFC	NELFC	388	353	812.647	4	1.4	36.17
NELFA	NELFA	190	219	771.43	3	0.9	36.13
NELFA	NELFA	200	207	614.338	4	-0.7	36.04
NELFB	NELFB	146	126	557.317	3	1.9	35.85
NELFC	NELFC	493	518	783.657	4	0.7	35.68
NELFE	NELFE	95	87	545.315	3	1.2	35.63
NELFB	NELFB	213	122	545.513	5	1.2	35.5
NELFE	NELFE	78	87	674.373	3	0.7	35.35
NELFC	NELFC	125	380	482.478	5	1.9	35.2
NELFA	NELFA	200	429	524.551	4	1.9	35.18
NELFB	NELFB	118	85	696.566	5	0.9	34.97
NELFA	NELFA	255	207	736.9	4	1.3	34.66
NELFB	NELFB	146	278	607.662	3	0.3	34.35
NELFA	NELFA	190	429	533.303	4	-0.3	34.29
NELFA	NELFA	219	429	496.295	4	0.1	34.28
NELFC	NELFC	353	518	459.247	4	0.9	34.27
NELFE	NELFE	97	130	907.22	4	1.1	34.26
NELFA	NELFA	200	429	451.063	5	2.4	34.06
NELFB	NELFB	85	438	771.424	3	0.1	33.9
NELFB	NELFB	122	210	465.776	4	2	33.73
NELFB	NELFB	85	278	559.547	4	1.4	33.5
NELFB	NELFB	146	497	371.204	5	0.6	33.47
NELFA	NELFA	215	200	570.724	5	2.2	33.4
NELFB	NELFB	92	278	469.768	4	2.2	33.32
NELFB	NELFB	213	278	632.601	4	3	33.3
NELFA	NELFA	200	219	570.073	4	2.1	33.29
NELFB	NELFB	85	497	454.043	5	1.2	33.21
NELFE	NELFE	101	130	846.925	4	0.6	33.2
NELFA	NELFA	181	207	953.851	3	-0.9	33.06
NELFB	NELFB	85	122	640.61	4	0.9	32.95
NELFA	NELFA	181	429	664.88	4	2.8	32.95
NELFE	NELFE	34	97	750.062	3	2	32.71
NELFB	NELFB	434	438	610.134	5	2.3	32.67
NELFE	NELFE	355	332	1060.54	3	1.4	32.66
NELFC	NELFC	384	353	652.106	4	2.2	32.59
NELFC	NELFC	125	518	408.832	5	-0.7	32.52
NELFA	NELFA	181	170	608.357	5	1.4	32.49
NELFB	NELFB	72	85	627.164	6	2.1	32.42
NELFE	NELFE	130	97	725.63	4	0.9	32.38
NELFE	NELFE	130	82	656.578	4	-0.2	32.35
NELFB	NELFB	438	126	392.241	4	2.1	32.29
NELFC	NELFC	384	353	688.696	3	-0.1	32.17
NELFA	NELFA	181	219	946.863	3	0.4	32.14
NELFB	NELFB	278	126	496.953	3	1.2	32.08
NELFC	NELFC	388	380	819.159	4	0.6	31.97
NELFE	NELFE	130	78	939.825	3	2.7	31.92
NELFE	NELFE	97	82	594.824	4	2.2	31.9
NELFE	NELFE	130	332	701.109	4	2.9	31.79
NELFA	NELFA	207	429	501.537	4	1.2	31.76
NELFE	NELFE	82	97	616.664	3	0.3	31.73
NELFB	NELFB	122	210	398.441	5	0.8	31.65
NELFC	NELFC	384	518	566.562	4	1	31.59
NELFB	NELFB	122	129	501.301	4	1.5	31.54
NELFC	NELFC	388	494	991.833	3	2	31.49
NELFA	NELFA	181	200	1036.57	3	1.5	31.49
NELFB	NELFB	135	497	540.044	4	2.2	31.49
NELFA	NELFA	200	200	510.084	5	1.3	31.43
NELFC	NELFC	343	125	850.723	4	0.9	31.42
NELFB	NELFB	129	497	460.016	4	1.6	31.36
NELFB	NELFB	213	126	713.663	4	0.2	31.33
NELFC	NELFC	222	522	866.864	5	2.9	31.29
NELFE	NELFE	97	87	394.47	4	1.9	31.28
NELFB	NELFB	129	122	533.325	4	2.4	31.28
NELFA	NELFA	200	522	467.052	5	0.5	31.26
NELFE	NELFE	260	130	928.968	4	1.8	31.25
NELFC	NELFC	161	125	648.844	6	-0.2	31.09
NELFA	NELFA	190	207	584.066	4	1.2	31.07
NELFE	NELFE	260	332	842.688	4	-0.4	31.06
NELFA	NELFA	255	200	639.353	5	1.3	31.02
NELFB	NELFB	146	210	615.675	3	0.9	30.94
NELFE	NELFE	373	332	1134.57	3	-0.3	30.91
NELFB	NELFB	72	92	680.571	5	0.9	30.81
NELFE	NELFE	101	130	907.219	4	-1	30.77
NELFE	NELFE	82	95	636.356	3	1.7	30.77
NELFE	NELFE	101	95	890.15	3	-0.4	30.62
NELFB	NELFB	213	122	713.663	4	0.2	30.56
NELFB	NELFB	99	126	597.353	4	1.2	30.41
NELFE	NELFE	130	87	784.061	3	0.4	30.26
NELFE	NELFE	70	87	515.803	4	0.4	30.22
NELFB	NELFB	438	278	572.999	3	2.4	30.21
NELFE	NELFE	97	87	526.542	4	0.1	30.16
NELFC	NELFC	222	522	841.244	5	1.8	30.16
NELFA	NELFA	429	272	543.326	3	1.3	30.08
NELFB	NELFB	135	278	709.383	3	0	29.79
NELFC	NELFC	388	380	858.182	4	-1.8	29.76
NELFA	NELFA	215	200	539.502	5	-0.5	29.68
NELFB	NELFB	525	497	843.463	4	-1.8	29.67
NELFE	NELFE	130	95	967.171	3	0.7	29.63
NELFC	NELFC	67	125	618.737	5	1	29.55
NELFA	NELFA	200	190	646.105	4	0.2	29.54
NELFA	NELFA	456	200	778.185	4	1.6	29.18
NELFE	NELFE	34	87	743.049	3	-0.5	29.11
NELFB	NELFB	210	497	339.794	5	2.1	29.11
NELFE	NELFE	47	87	564.54	4	-0.4	29.11
NELFA	NELFA	255	181	900.242	4	0.8	29.09
NELFB	NELFB	547	519	656.561	5	2.8	29.07
NELFB	NELFB	291	278	708.057	3	0.2	29.05
NELFA	NELFA	181	168	721.168	4	0.4	29.04
NELFB	NELFB	92	497	477.522	4	2.1	29.04
NELFB	NELFB	525	497	963.524	3	2.9	28.68
NELFE	NELFE	101	87	708.132	4	0.4	28.66
NELFA	NELFA	215	200	642.102	4	-1.1	28.65
NELFA	NELFA	456	446	939.988	4	0.1	28.61
NELFA	NELFA	255	456	939.77	4	0.4	28.44
NELFC	NELFC	380	353	551.303	4	0	28.41
NELFC	NELFC	380	494	467.07	5	1.4	28.4
NELFA	NELFA	371	429	698.578	5	3	28.35
NELFA	NELFA	446	429	686.356	4	1.9	28.31
NELFE	NELFE	70	82	584.084	4	1.8	28.19
NELFE	NELFE	47	33	576.58	4	1.6	28.09
NELFA	NELFA	200	520	583.564	4	1.2	27.99
NELFE	NELFE	47	78	681.361	4	-0.9	27.93
NELFE	NELFE	326	332	1050.05	4	1	27.84
NELFA	NELFA	215	190	650.854	4	-1	27.69
NELFA	NELFA	200	170	541.816	4	2.5	27.67
NELFB	NELFB	85	519	667.621	4	2	27.66
NELFE	NELFE	130	95	608.325	4	-0.3	27.63
NELFE	NELFE	34	27	601.602	4	1.2	27.57
NELFB	NELFB	92	72	633.367	3	0.1	27.56
NELFE	NELFE	97	21	511.798	4	0.2	27.45
NELFB	NELFB	547	497	720.127	4	-0.3	27.11
NELFA	NELFA	371	456	751.404	6	0.7	27.07
NELFA	NELFA	190	170	550.568	4	0.8	27
NELFB	NELFB	519	146	564.072	4	0.9	26.85
NELFA	NELFA	371	522	899.957	4	-0.6	26.58
NELFA	NELFA	371	181	1087.07	4	1	26.57
NELFB	NELFB	85	135	681.11	4	0.6	26.38
NELFE	NELFE	95	21	511.798	4	0.3	26.32
NELFE	NELFE	47	97	759.397	3	0.7	26.3
NELFB	NELFB	361	291	929.996	4	0.1	26.25
NELFC	NELFC	353	494	476.27	4	0.7	25.72
NELFE	NELFE	101	87	647.838	4	0.5	25.44
NELFE	NELFE	95	87	526.542	4	0.5	25.29
NELFE	NELFE	47	95	701.873	4	1.2	25.26
NELFA	NELFA	200	520	622.589	4	0.8	25.25
NELFA	NELFA	215	200	545.104	5	0	25
NELFA	NELFA	200	522	735.051	3	1.3	24.99
NELFB	NELFB	278	497	489.767	4	0.5	24.91
NELFB	NELFB	398	438	821.697	4	2.5	24.88
NELFA	NELFA	371	190	955.499	4	1.7	24.57
NELFE	NELFE	373	355	1032.01	4	-1	24.18
NELFB	NELFB	261	291	1069.92	5	-1.1	24.13
NELFA	NELFA	371	522	931.98	4	-1.3	24.01
NELFB	NELFB	392	438	1014.78	4	1.9	23.96
NELFE	NELFE	47	82	632.821	4	0.9	23.9
NELFA	NELFA	522	429	636.681	3	0.6	23.78
NELFA	NELFA	16	429	992.137	5	0.9	23.29
NELFE	NELFE	66	78	922.741	4	1.1	23.23
NELFA	NELFA	371	255	886.867	5	0	23.19
NELFE	NELFE	332	87	669.023	3	0	23.07
NELFB	NELFB	85	291	680.117	4	2.5	22.97
NELFA	NELFA	371	200	985.77	4	-0.5	22.77
NELFA	NELFA	200	219	811.794	3	1.9	22.5
NELFE	NELFE	260	355	1023.52	4	0.4	22.48
