# Supplementary material for: Architecture and RNA binding of the human negative elongation factor
Source: eLife journal article supplement (doi:10.7554/elife.14981), 2016-06-10
Supplement: supp [file elife-14981-supp-v1.zip]

## Figure 8-figure supplement 2

>NELF-A

MASMR**ESDTGLWLHNK**LGATDELWAPPSIASLLTAAVIDNIRLCFHGLSSAVK**LKLLGLTLHLPRRTV**  
DEMKGALMEIIQLASLSDPWVLMVADILKSFPDTGSLNLEEEQNPNVQDILGELREKVGECEAS  
AMLPLECQYLNK**NALTTLAGPLTPPVKH**FQLKRKPKSATLRAELLQKSTETAQQLKRSAGVPFHAK  
GRGLLRKMDTTTTPLKGIPKQAPFRSPTAPSVFSPTGNRTPIPPSRTLRLKER**GVKLLDISELDMVGA**  
**GREAKRRRKTLDAEVVEKPAKEETVVENATPDYAAGLVSTQK**LGSNNPALPSTSYLPSTPSVVP  
ASSYIPSSETPPAPSSR**EASRPPEEPSAPSPTLPAQFKQR**APMYNSGLSPATPTPAAPTSPPTPTTP  
PAVAPTTQTTPVAMVAPQTQAPAQQQPKKNLSLTR**EQMFAAQEMFKTANKVTRPEKALILGF**MAG  
**SRENPCQEQQDVIQIKLSEHTEDLPKADGGQSTTMLVDTVFEMNYATGQWTR**FKKYKPMTNVS

>NELF-B

MFAGLQDLGVANGEDLK**ETLTNCTEPLKA**IEQFQTENGVLPSLQSAFPFLDLHGTPRLEFHQS  
DELDRKLLER**VSAIASEGKAEERYKKLEDLLEK**SFSLVKMPSLQPVVMCMKHLPKVPEKK**LKLVM**  
**ADKELYRACAVEVKRQIWQDNQALFGDEVSPLLKQYILEKESALFSTELSVLHNFSPSPKTRRQG**  
**EVVQRLTR**MVGKNV**KLYDMVLQFLRTLFLRTRNVHYCTLRAELLMSLHDLVDGEICTVDPCHKFT**  
WCLDACIRERFVDSKR**ARELQGFLDG**VKKGQEQVLGDLSMILCDPFAINTLALSTVR**HLQELVGQE**  
**TLPRDSPDLLLLRLALGQGAWDMIDSQVFKEPKMEVELITRFLPMLMSFLVDDYTFNVDQKLPA**  
**EEKAPVSYPNLTPESFTKFLQEQR**MACEVGLYYVLHITKQRNKNALLRLLPLGVETFGDLAFGDIFL  
HLLTGNLALLADEFALEDFCSSLFDGFFLTASPRKENVHR**HALRLLIHLHPRVAPSKLEALQKALEPT**  
**QGSGEAVKELYSQLGKLEQLDHRKPSPAQAAETPALELPLPSVPAPAPL**

>NELF-C/D

MRRARSREGMDDEDYYGSAAEWGDEADGGQQEDDSGEGEDDAEVQQECLHK**FSTRDYIMEPSI**  
**FNTLKRYFQAGGSPENVIQLLSENYTAVAQTVNLLAEWLIQTGVEPVQVQETVENHLKSLLIKHFDP**  
**RKADSIFTEEGETPAWLEQMIAHTTWRDLFYKLAEHPDCLMLNFTVKLISDAGYQGEITSVSTAC**  
QQLEVFSRVLRT**SLATILDGGEENLEKNLPEFAK**MVCHGEHTYLFAQAMMSVLAQEEQGGSAVRR  
**IAQEVQRFAQEKGH**DASQITLALGTAASYPRACQALGAMLSKGALNPADITVLFKMFTSMDPPPV  
**LIRVPAFLDLFMQSLFKPGARINQDHKHKYIHILAYAASVVETWKKNKRV**SINKDELKSTSKAVETVH  
NLCCNENK**GASELVAELSTLYQCIRFPV**VAMGV**LKWVDWTVSEPRYFQLQTDHTPVHLALLDEIST**  
CHQLLHPQVLQLLVK**LFETEHSQLDVMEQLELKKTL**DRMVHLLSRGYVLPVVSYIRKCLEK**LDTDI**  
**SLIRYFVTEVLDVIAPPYTSDFVQLFLPILEND**SIAGTIK**TEGEHDPVTEFIAHCK**SNFIMVN

>NELF-E

MLVIPPG**LSEEEEEALQKKFNK**LKKKKKALLALKKQSSSSTTSQGGVKR**SLSEQPVM**DTATATEQAK  
QLVK**SGAISA**KAETKNSGFKRSRTLEGKLDPEK**GPVPTFQPFQRSISADDDLQESSRRPQRKSL**  
**YESFVSSSDRLREL**GPDGEEAEGPGAGDGPPRSFDWGYEERSGAHSSASPPRSRSDRSHERN  
RDRDRDRERDRDRDRDRDRDRERDRDRDRDRDRDRDRERDRDRDRDRREGPFRRSDSPERR  
APR**KGNTLYVYGEDMTPTLLRGAFSPFGNI**DLSDPPRNCAFVTYEK**MESADQAVAE**LN**GTQVE**  
**SVQLKVNIARKQPM**LD**AATGK**SVWGS**LAVQNSPKGCH**RD**KRTQIVYSDDVYKEN**LVDGF
