# Supplementary material for: Architecture and RNA binding of the human negative elongation factor
Source: eLife journal article supplement (doi:10.7554/elife.14981), 2016-06-10
Supplement: supp [file elife-14981-supp-v1.zip]

Figure 1-figure supplement 3

|                     |     |                                                                            |                |
|---------------------|-----|----------------------------------------------------------------------------|----------------|
| H_sapiens/1-590     | 1   | MAG-----                                                                   | -----AVPGAI--9 |
| Mus_musculus/1-591  | 1   | MAG-----                                                                   | -----PAPGTI--9 |
| Danio_rerio/1-579   |     | -----                                                                      | -----          |
| L_gigantea/1-532    |     | -----                                                                      | -----          |
| Dros_melan/1-578    |     | -----                                                                      | -----          |
| Loa_loa/1-576       |     | -----                                                                      | -----          |
| Dicty_disc/1-660    |     | -----                                                                      | -----          |
| Chlor_variabl/1-891 | 1   | MDGSPGPAANEAGPEASDGGSGGAGAEAGGSPAAAAEKLARQESSGEAALASSQQAHDGCTLAADPGSSGR    | 72             |
| H_sapiens/1-590     | 10  | -----MDEYDYGSAAEWGD-----                                                   | 23             |
| Mus_musculus/1-591  | 10  | -----MGEDYFGNASEWGE-----                                                   | 23             |
| Danio_rerio/1-579   | 1   | -----MDEEYSHAGEW-----                                                      | 12             |
| L_gigantea/1-532    |     | -----                                                                      | -----          |
| Dros_melan/1-578    | 1   | -----MEVEYDDSGWQG-----                                                     | 12             |
| Loa_loa/1-576       | 1   | -----ME-DPDDYGE-----                                                       | 9              |
| Dicty_disc/1-660    | 1   | -----MSTSPTHHQQQQQHQTSPH-----                                              | 47             |
| Chlor_variabl/1-891 | 73  | DGEQQEPAPMPLDAAVEQQEQEQEQEQHAGAGELEQRLPPEAGIQPQAGDEHAAQSQQQQQQQQEEEEEPGQQQ | 144            |
| H_sapiens/1-590     | 24  | -----EADGGQ-QEDDSGEGEDDAEVQQECL                                            | 48             |
| Mus_musculus/1-591  | 24  | -----EADGGQHEDDSGEGEDDAEVQQECL                                             | 49             |
| Danio_rerio/1-579   | 13  | -----EAQDGS-MEDGYGDAEADGKVQEDCL                                            | 37             |
| L_gigantea/1-532    |     | -----                                                                      | -----          |
| Dros_melan/1-578    | 13  | -----RAKGQT-NPEETLEDNPQKTI-QECL                                            | 36             |
| Loa_loa/1-576       | 10  | -----GDDETNEEFERKMLL-DHCI                                                  | 27             |
| Dicty_disc/1-660    | 48  | QQKQTSPT-----HNQP---TSPTNSSTTTTTTT-TNTNTLKPTDLIK-EKCE                      | 91             |
| Chlor_variabl/1-891 | 145 | GFAQSPPAADGGGGQQLAPAGALAGPDPDQHQQPGPGPEPEMDEGAEEAAA-EAAAAAALQQQRKL-NELE    | 214            |
| H_sapiens/1-590     | 49  | HKFSTRDYIMEPSIFNTLKRYFQAGGSPENVIQLLSENYTAVAQTVNLLAEWLIQT-----              | 104            |
| Mus_musculus/1-591  | 50  | HKFSTRDYIMEPSIFNTLKRYFQAGGSPENVIQLLSENYTAVAQTVNLLAEWLIQT-----              | 105            |
| Danio_rerio/1-579   | 38  | QKFSSRDYIMEPTVFNTLKSYPQAGGSPENVIQLLSENYSAVAQTVNLLAEWLIQM-----              | 93             |
| L_gigantea/1-532    | 1   | -----MEPDFNVLKKYLQAGGSPEKVVDDLSENYTAIAQTVNLLAEWLIQIE-----                  | 48             |
| Dros_melan/1-578    | 37  | EKFLTPDYIMEPGIFTQLKRYFQSGGSPPEEVISMLSENYKAVAQMANLLAEWLILA-----             | 92             |
| Loa_loa/1-576       | 28  | RHLNLPDFVMEPQIVGVLTQFFRCGGDPETVNNLLSENYCSLGQLCNLIGDWLADL-----              | 83             |
| Dicty_disc/1-660    | 92  | SSLQPPDSIMSI EASSLMKEYITVGGRPQDVITFLSESIRGYAQM CNLLCYWLKIA-----            | 147            |
| Chlor_variabl/1-891 | 215 | VLRQGLAVMEPAIMERLREYVMANGHEQAAVEYLTESYVGYAQMASIVCRWLEMTESQSGGGGGGTSGGPG    | 286            |
| H_sapiens/1-590     | 105 | -----GVPEVQVQETVENHLKSLLIKHFDPKADSIF                                       | 136            |
| Mus_musculus/1-591  | 106 | -----GVPEVQVQETVENHLKSLLIKHFDPKADSIF                                       | 137            |
| Danio_rerio/1-579   | 94  | -----GVPEAQVQERVENHLKSLLIKHFDPKADSIF                                       | 125            |
| L_gigantea/1-532    | 49  | -----SVDIKEVQVLVESHLKEMVIKCFDPKKADSIF                                      | 80             |
| Dros_melan/1-578    | 93  | -----GVKVTEVQAMVENHLKEMILKSFDPKADTIF                                       | 124            |
| Loa_loa/1-576       | 84  | -----EGSRSTVDECFESALSALIAKHFPPELADKIF                                      | 115            |
| Dicty_disc/1-660    | 148 | -----GIPEEQIQTFQSNHLKEIIINKFDPKVADTIF                                      | 179            |
| Chlor_variabl/1-891 | 287 | GAANGGTAAAAAASPGSWAAARGGGGGSGAAGGSAGAAAGGGGPLDEAF--YLRQLAKERFDPHLFATVF     | 356            |
| H_sapiens/1-590     | 137 | TEEGE-TPAWLEQMIA-----HTTWRDLFYKLAEAHDPDCLMLNFTV-KLISDAGYQG                 | 186            |
| Mus_musculus/1-591  | 138 | TEEGE-TPAWLEQMIA-----HTTWRDLFYKLAEAHDPDCLMLNFTV-KLISDAGYQG                 | 187            |
| Danio_rerio/1-579   | 126 | TVEGE-TPAWLEQMIA-----HTTWRDLFYKLAEAHDPDCLMLNFTV-KLISDAGYQG                 | 175            |
| L_gigantea/1-532    | 81  | TSEGE-IPSWLAEMIE-----YPTWRLLFYKLAEAYDPDCLMLNFTI-KLISDAGYQG                 | 130            |
| Dros_melan/1-578    | 125 | TEEGE-TPDWLTEMID-----HYTWRSLLIYRLAEAYDPDCLMLNFTI-KLISDAGFQS                | 174            |
| Loa_loa/1-576       | 116 | EAEGV-GIEWLPELIS-----HKPWRRLIYSLAEQYPHCLMLNFAV-KLISDAGFQH                  | 165            |
| Dicty_disc/1-660    | 180 | TSSST-PPHWLDEMIV-----DSQWRSLIYQLSEEHKNCMLNFI-ORISDSGYQN                    | 229            |
| Chlor_variabl/1-891 | 357 | TSGGSGAPQWLNGLIASPGTPLLCFLRLQRRACSHGCGGRSLVYELAGRYKNSLLNFAIHKILMQPGREK     | 426            |

NELF-C  
C-terminal region  
(186-590 in *H.s.*)
