# Supplementary figures and images for: Architecture and RNA binding of the human negative elongation factor
Source: eLife journal article supplement (doi:10.7554/elife.14981), 2016-06-10

**Figure 6-figure supplement 1**

**A**

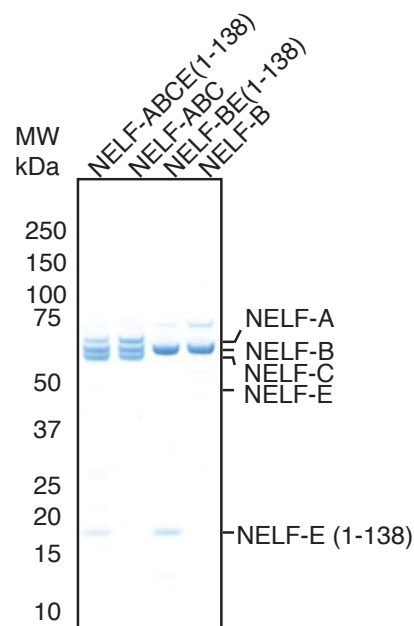

**B**

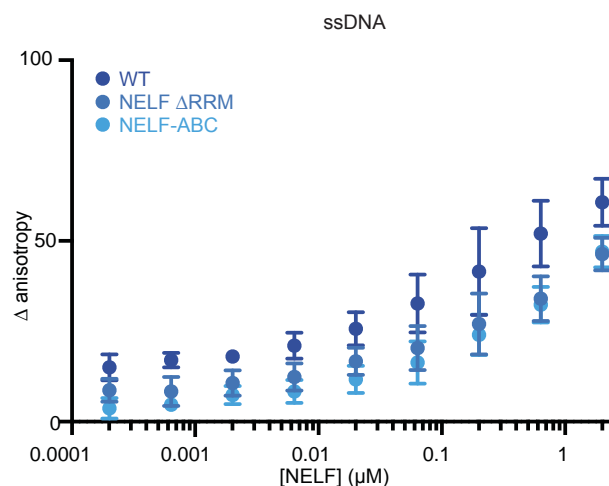

**C**

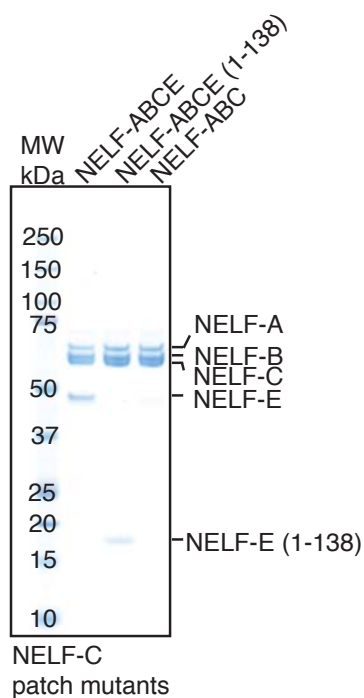

**D**

**DNA Binding**

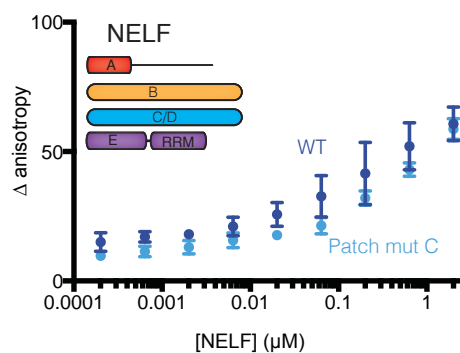

**E**

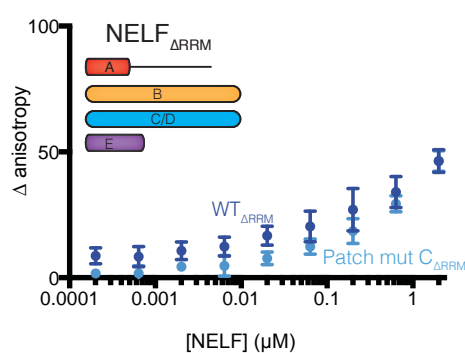

**F**

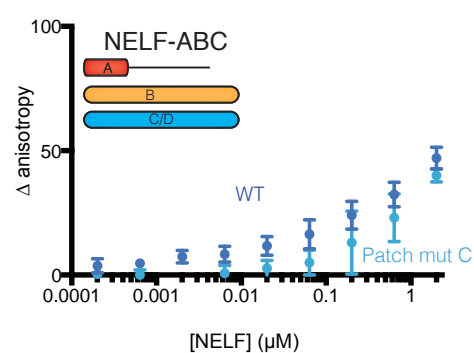

Supplement: supp [file elife-14981-supp-v1.zip]

**Figure 1-figure supplement 1**

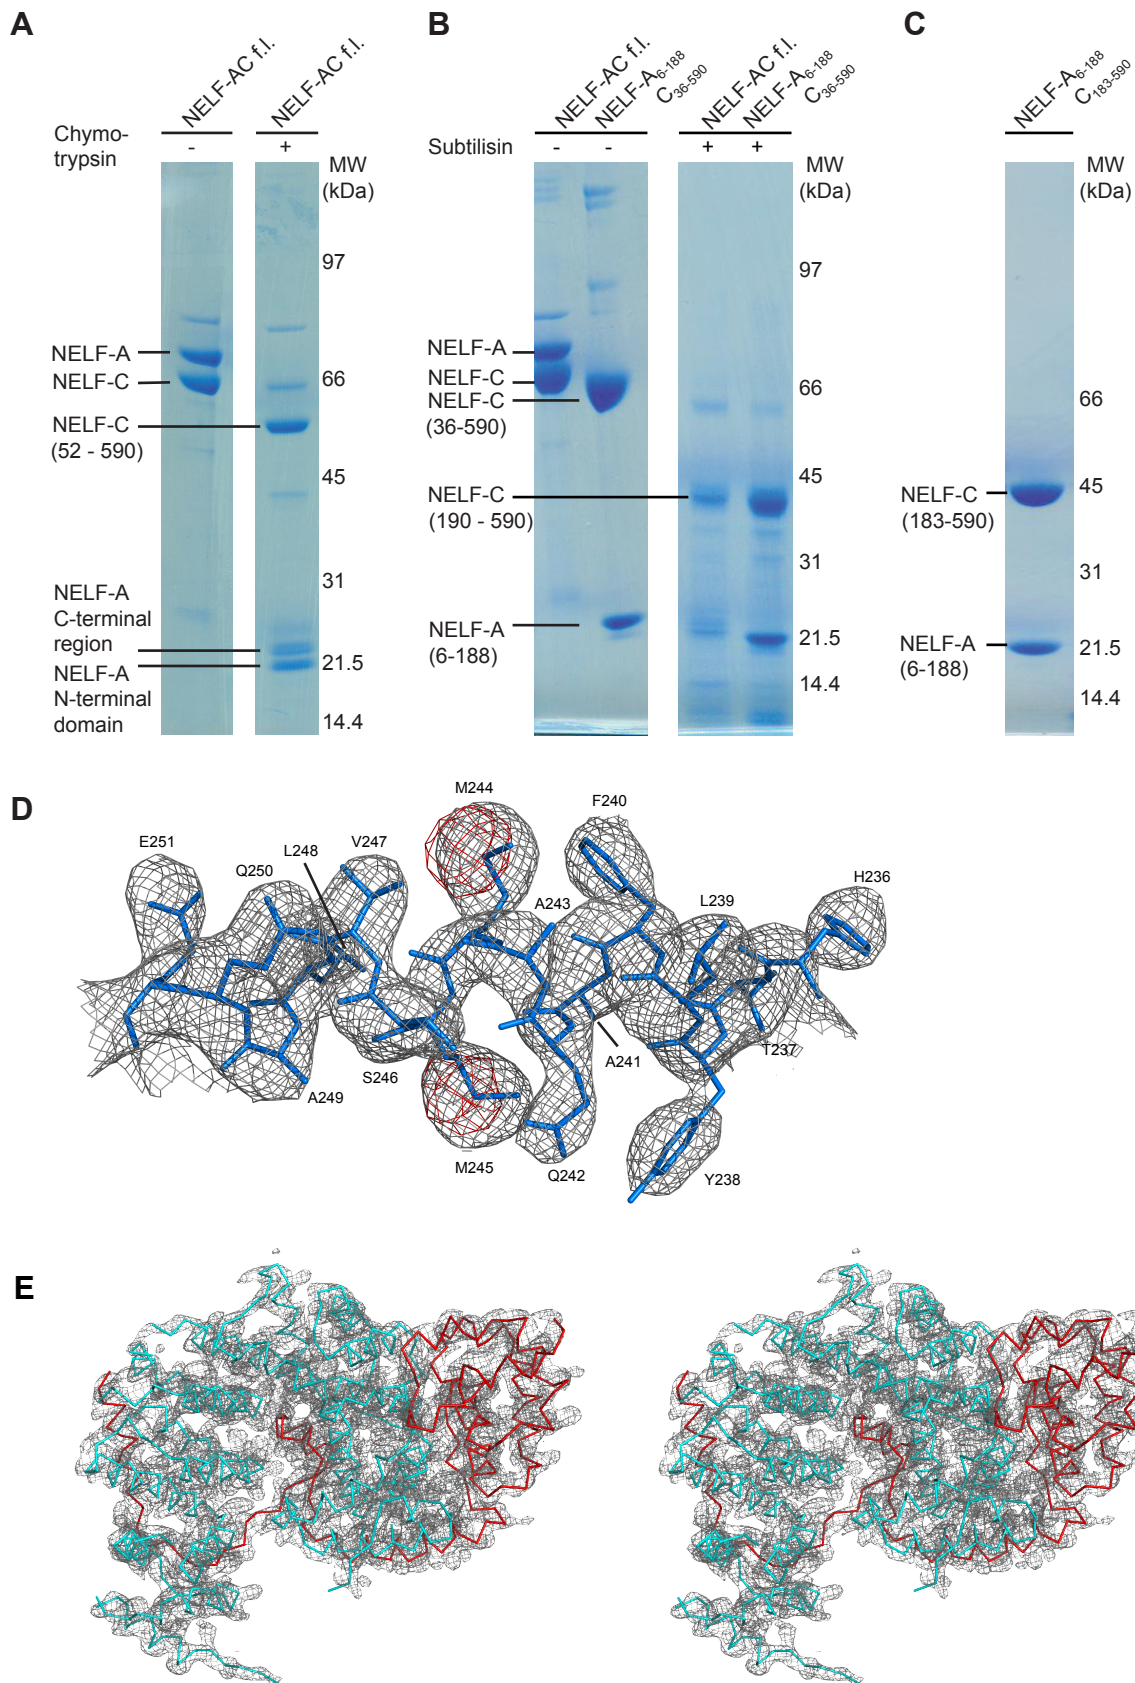

Supplement: supp [file elife-14981-supp-v1.zip]

Figure 5-figure supplement 1

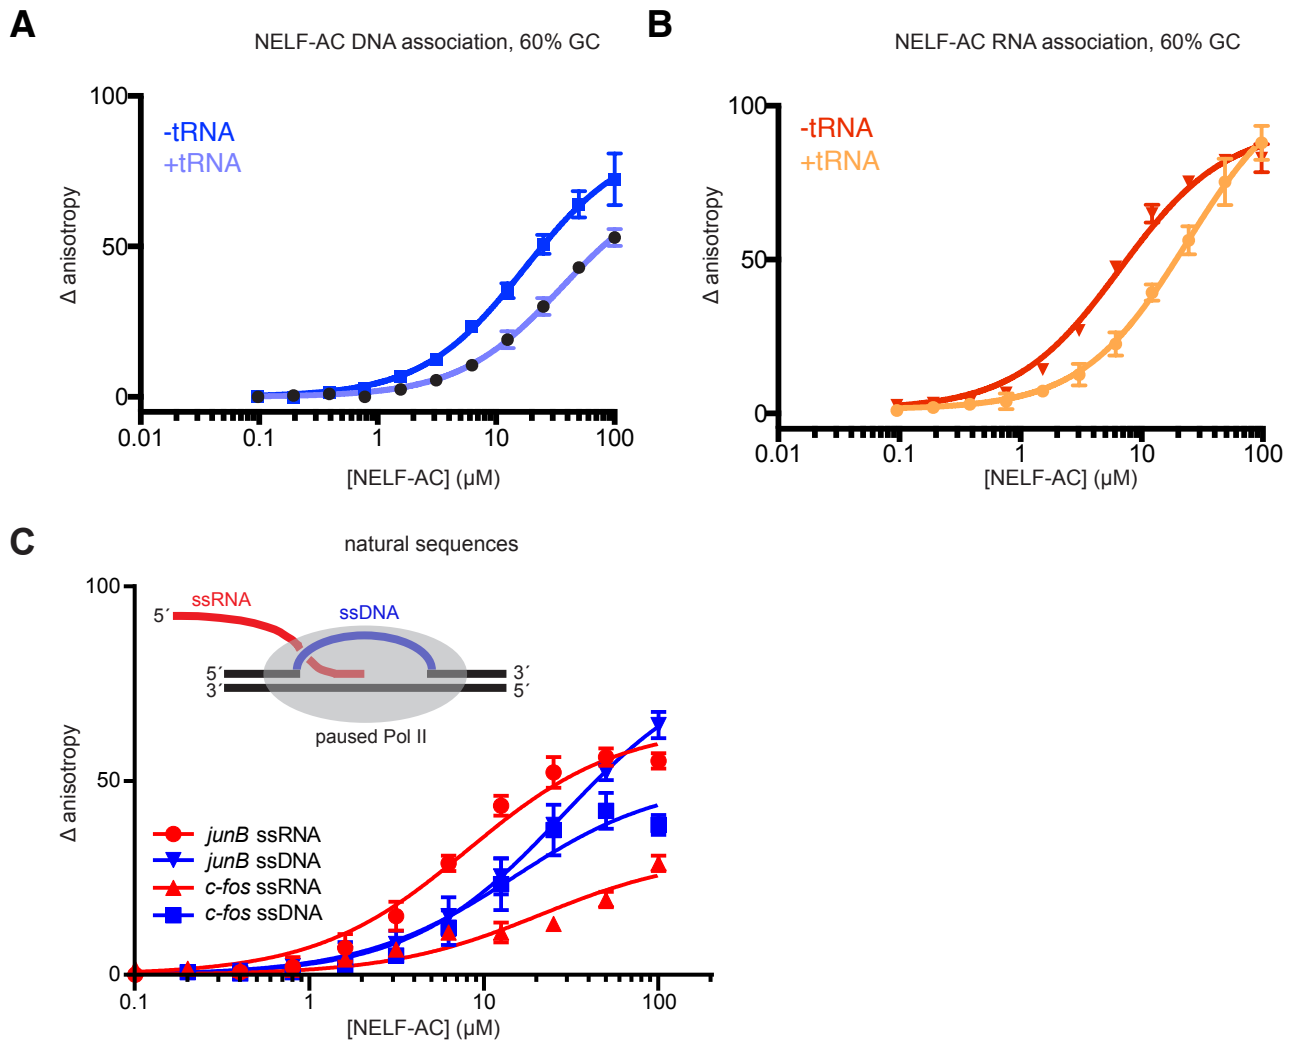

Supplement: supp [file elife-14981-supp-v1.zip]

Figure 4- figure supplement 1

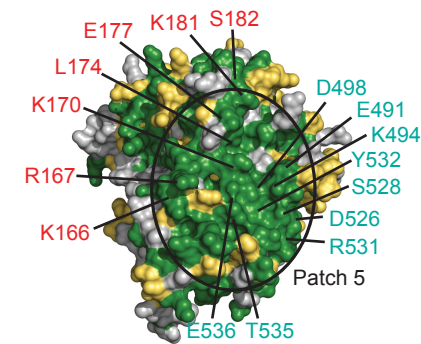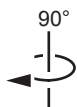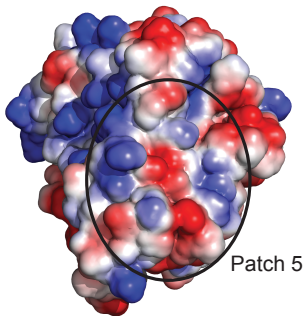

side view

Supplement: supp [file elife-14981-supp-v1.zip]

**Figure 8-figure supplement 1**

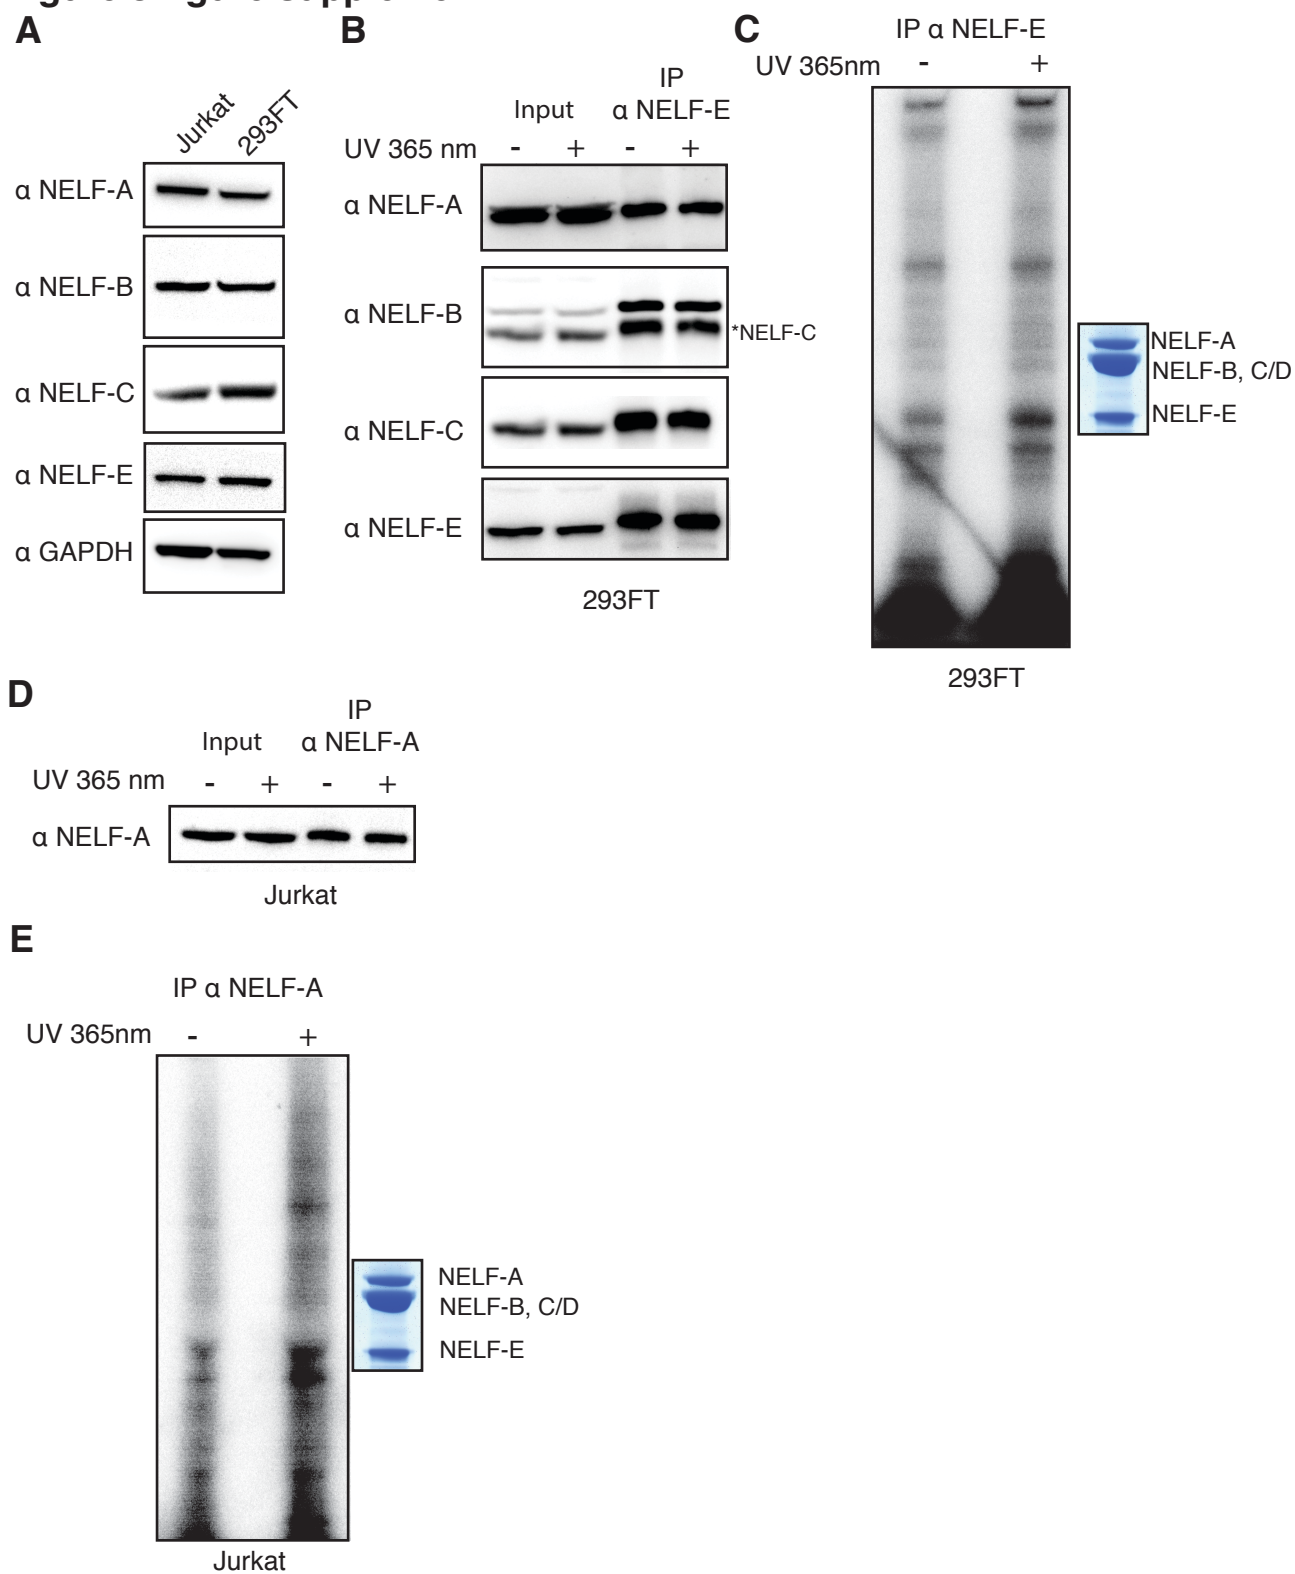

Supplement: supp [file elife-14981-supp-v1.zip]

# Figure 1-figure supplement 2

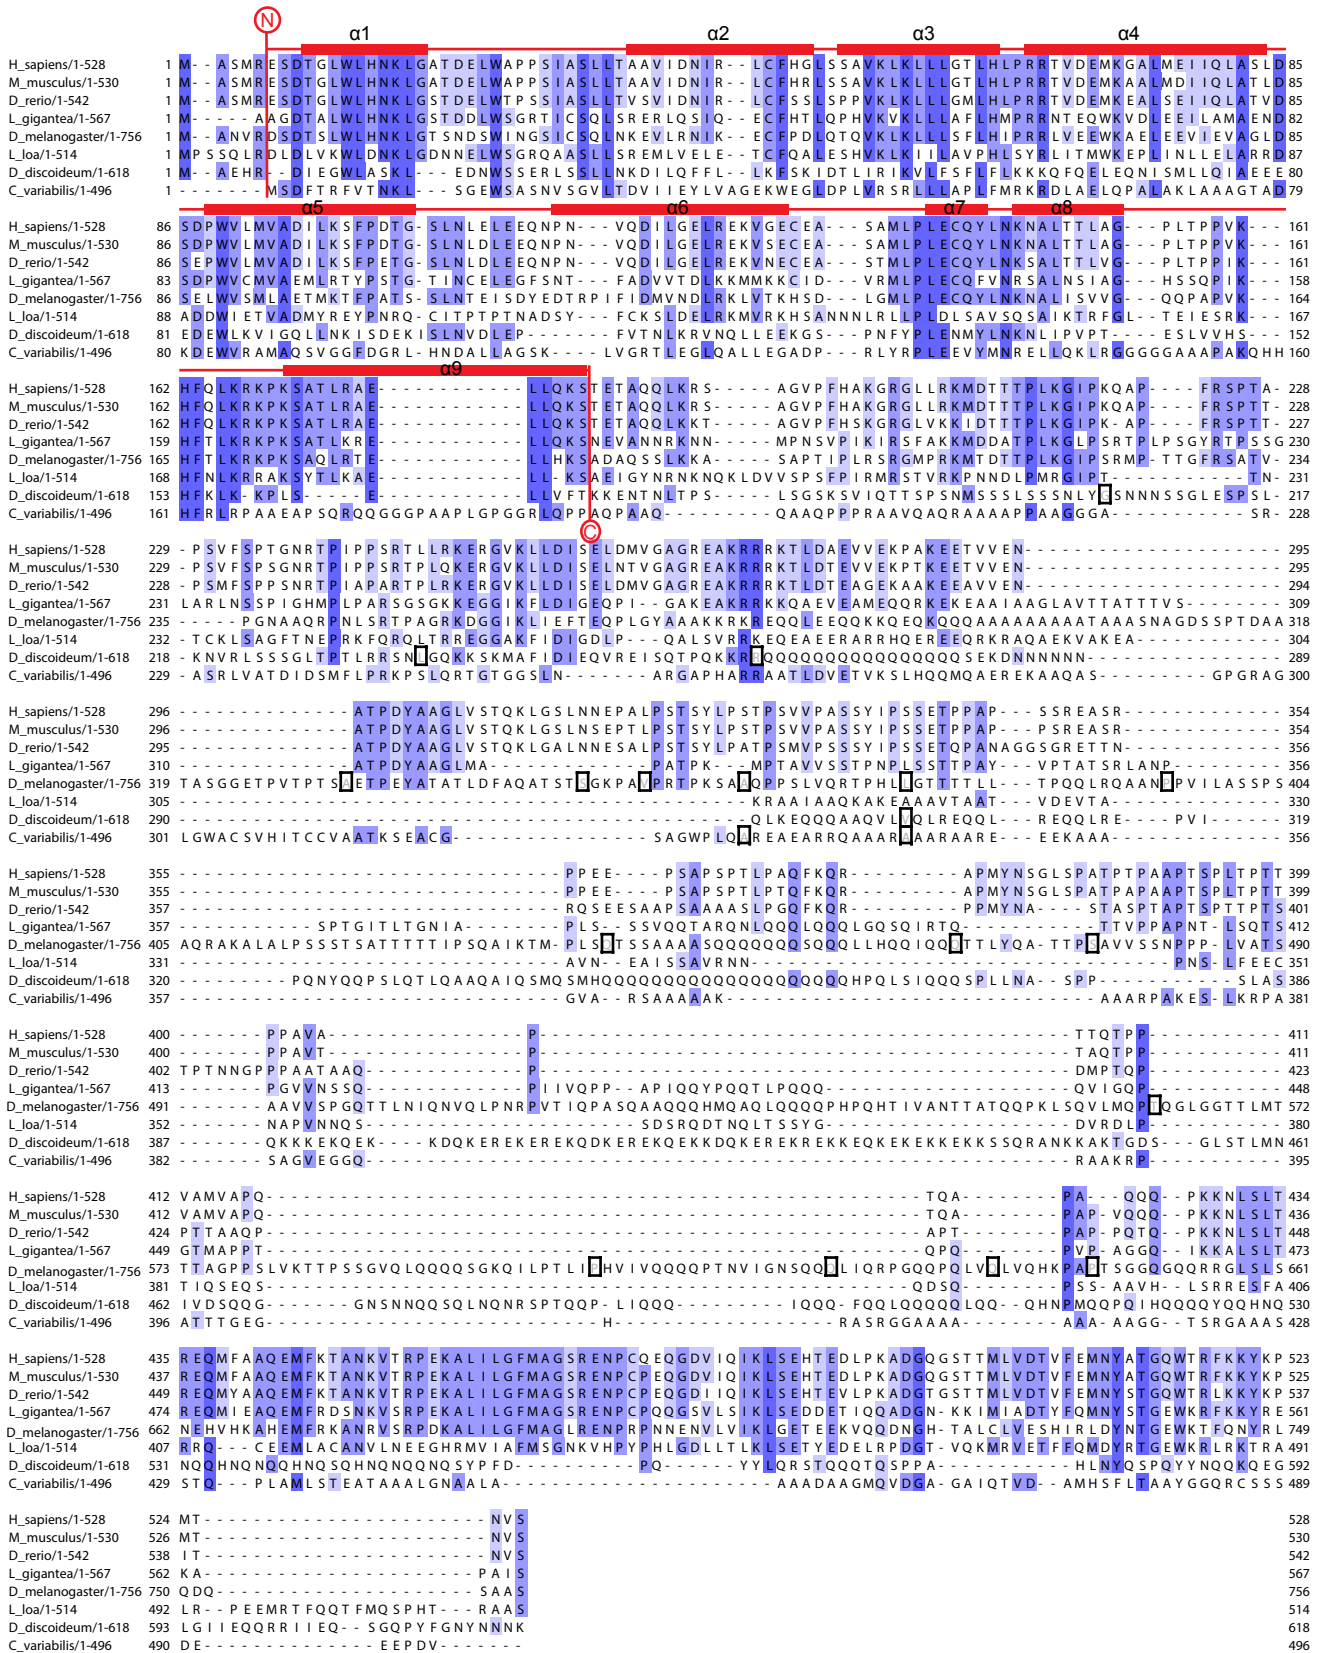

Supplement: supp [file elife-14981-supp-v1.zip]

Figure 8-figure supplement 3

**A**

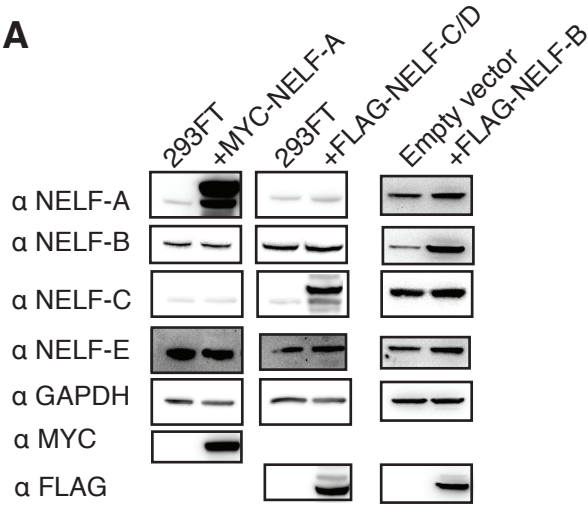

**B**

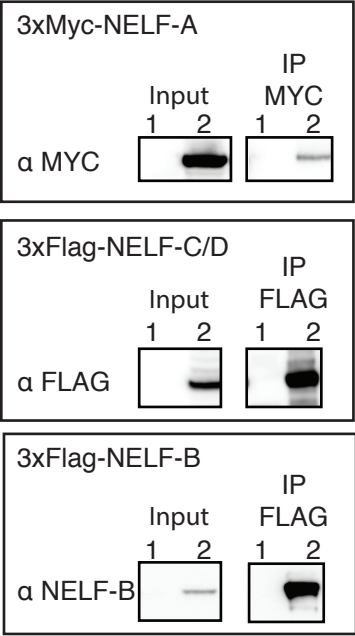

**C**

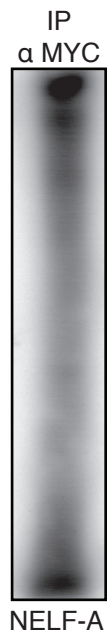

Supplement: supp [file elife-14981-supp-v1.zip]

Figure 3- figure supplement 1

A

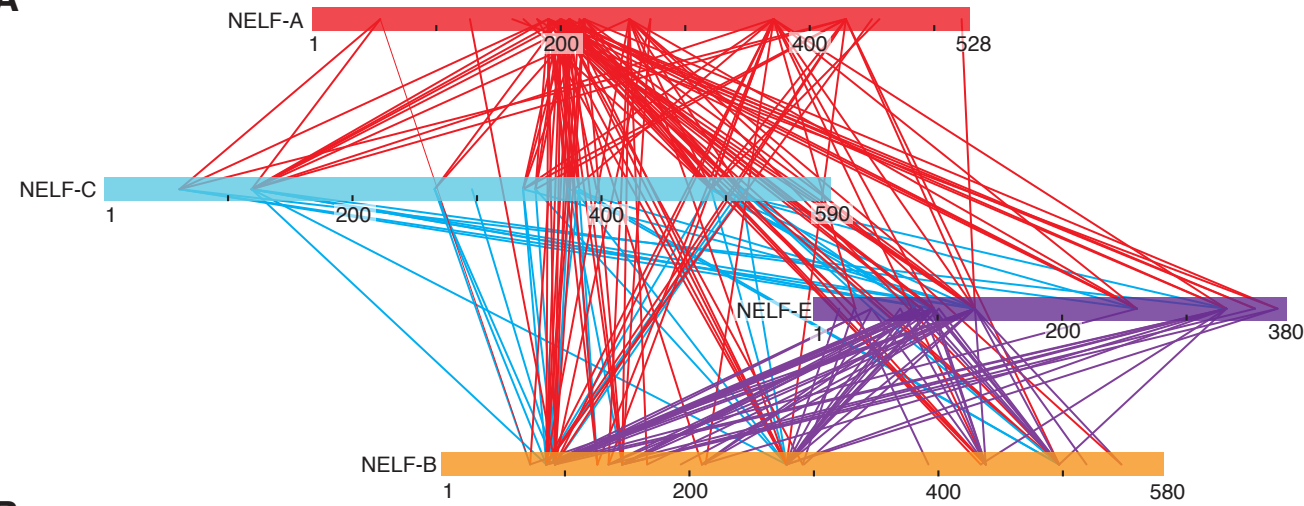

B

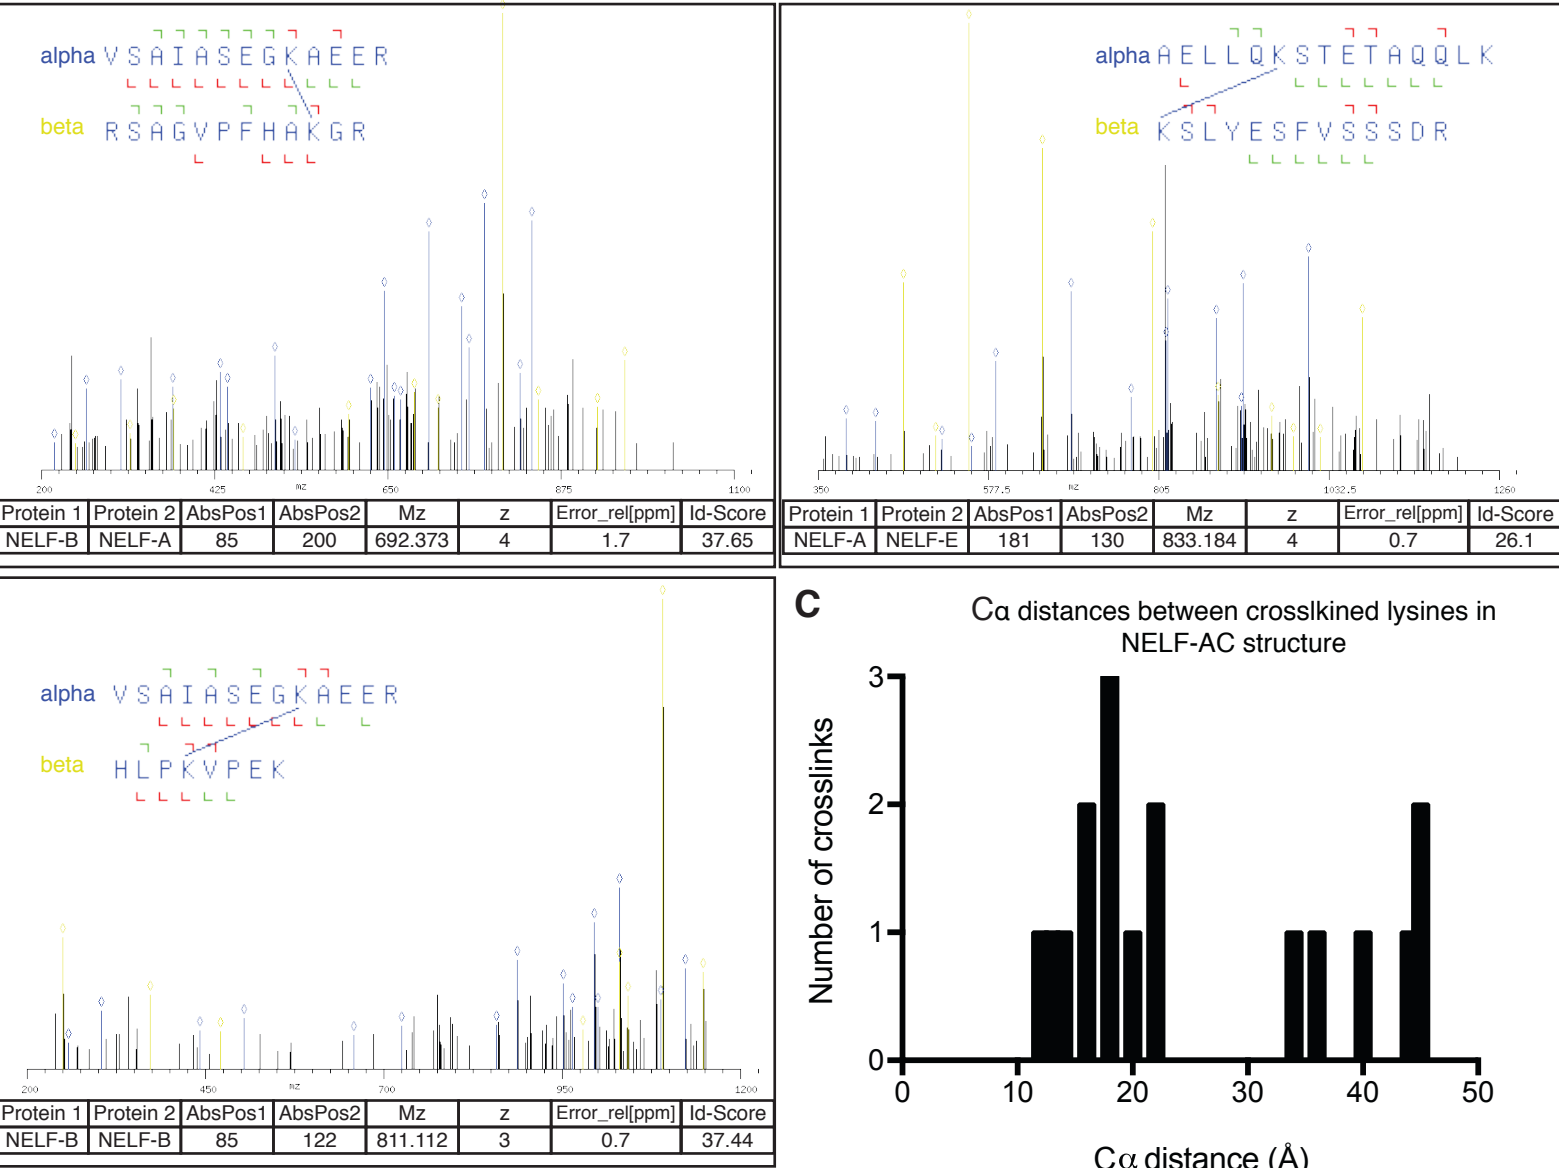

C

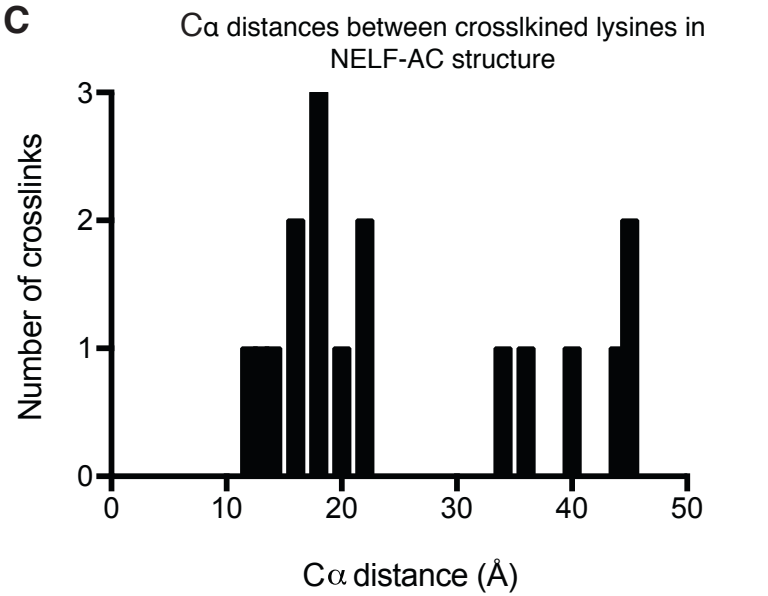

D

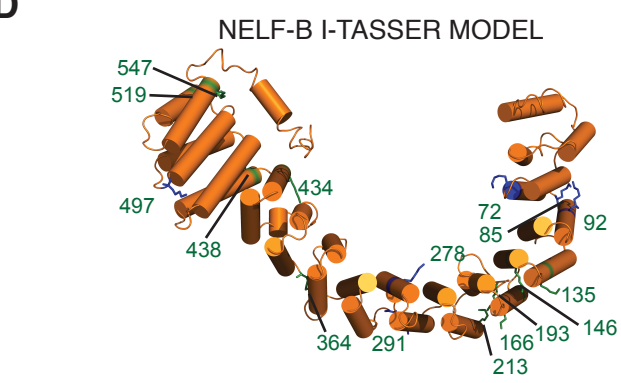

E

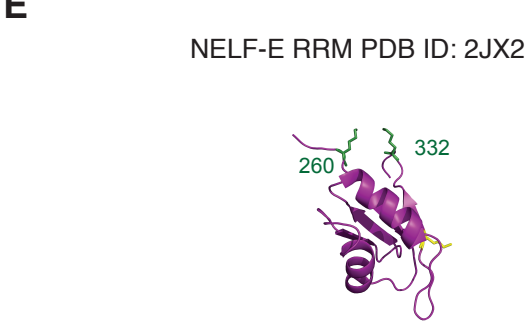

Supplement: supp [file elife-14981-supp-v1.zip]
